# Supplementary material for: Neural and behavioural responses to face-likeness of objects in adolescents with autism spectrum disorder
Source: PubMed Central journal article supplement — Sci Rep. 2014 Jan 27;4:3874. doi: 10.1038/srep03874 (PMC5379204; doi:10.1038/srep03874), 2014-01-27
Supplement: srep03874-s1.pdf [file srep03874-s1.pdf]

Supplementary Information for

**Neural and behavioural responses to face-likeness of objects in adolescents with autism spectrum disorder**

Hironori Akechi <sup>1,2\*</sup>, Yukiko Kikuchi <sup>1,3</sup>, Yoshikuni Tojo <sup>3</sup>, Hiroo Osanai <sup>4</sup>, & Toshikazu Hasegawa <sup>5</sup>

<sup>1</sup> Japan Society for the Promotion of Science, Tokyo, Japan

<sup>2</sup> Division of Information System Design, Tokyo Denki University, Saitama, Japan

<sup>3</sup> College of Education, Ibaraki University, Ibaraki, Japan

<sup>4</sup> Musashino Higashi Center for Education and Research, Musashino Higashi Gakuen, Tokyo, Japan

<sup>5</sup> Department of Cognitive and Behavioral Science, University of Tokyo, Tokyo, Japan

\* Corresponding author: Hironori Akechi, Division of Information System Design, Tokyo Denki University, Ishizaka, Hatoyama-machi, Hiki-gun, Saitama 350-0394, Japan. E-mail: akechi@cogn.jp

a

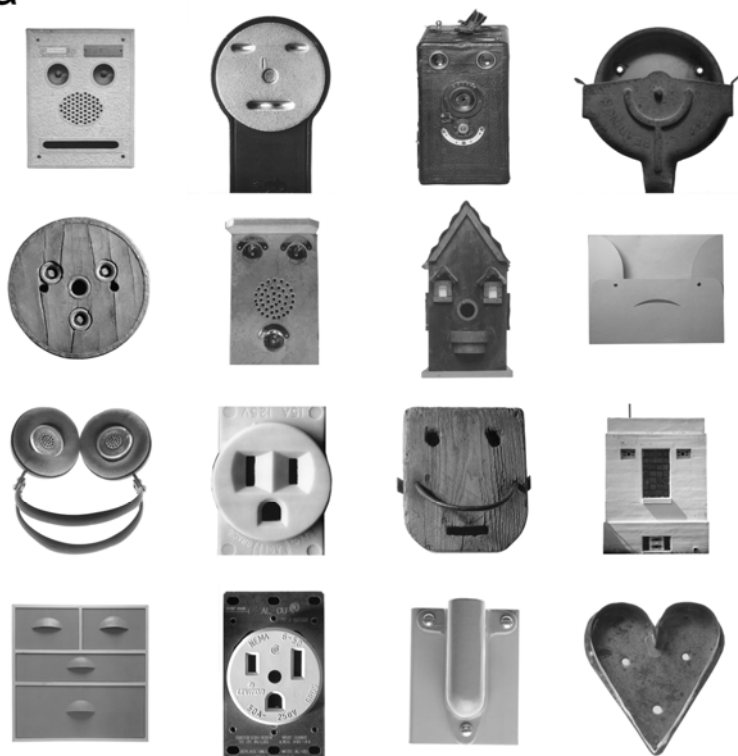

b

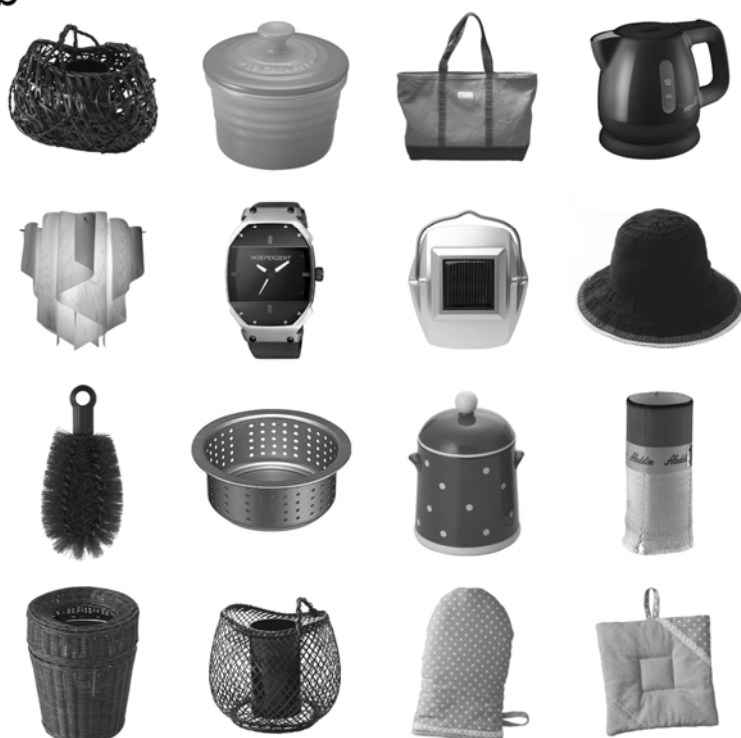

**Supplementary Figure S1 | Stimuli used in Experiment 2.** (a) Sixteen face-like objects (FLOs) and (b) 16 non-FLOs were used as test stimuli in Experiment 2. (a) From FACES by Francois Robert and Jean Robert. © 2000 by Francois Robert. Used with permission of the authors and Chronicle Books LLC, San Francisco.
